# Supplementary material for: Molecular Insight into Ligand Binding and Transport by the Lentil Lipid Transfer Protein Lc-LTP2: The Role of Basic Amino Acid Residues at Opposite Entrances to the Hydrophobic Cavity
Source: MDPI journal article supplement (doi:10.3390/biom13121699), 2023-11-24
Supplement: s1 [file s1]

# Molecular insight into ligand binding and transport by the lentil lipid transfer protein Lc-LTP2: the role of basic amino acid residues at opposite entrances to the hydrophobic cavity

Daria N. Melnikova <sup>1,2,\*</sup>, Ivan V. Bogdanov <sup>1</sup>, Andrey E. Potapov <sup>1,2</sup>, Anna S. Alekseeva <sup>1</sup>, Ekaterina I. Finkina <sup>1</sup> and Tatiana V. Ovchinnikova <sup>1,2</sup>

1 M.M. Shemyakin & Yu.A. Ovchinnikov Institute of Bioorganic Chemistry, the Russian Academy of Sciences, 117997 Moscow, Russia; [contraton@mail.ru](mailto:contraton@mail.ru) (I.V.B.); [anna@lipids.ibch.ru](mailto:anna@lipids.ibch.ru) (A.S.A.); [finkina@mail.ru](mailto:finkina@mail.ru) (E.I.F.); [ovch@ibch.ru](mailto:ovch@ibch.ru) (T.V.O.)

2 Phystech School of Biological and Medical Physics, Moscow Institute of Physics and Technology, 141701 Dolgoprudny, Russia

\* Correspondence: [d\\_n\\_m@mail.ru](mailto:d_n_m@mail.ru).

Table S1. List of mutagenizing primers.

| Mutation | Mutagenesis primer sequences (5'-3')        |
|----------|---------------------------------------------|
| sK61A    | CAGCAGCCGGTTCTATTACTGTGTTGAATACTAACAACGCTGC |
| ansK61A  | AGTAATAGAACCGGCTGCTGATT                     |
| sK81A    | ATCAGTACCACCACCAACTGTAA                     |
| ansK81A  | CAGTTGGTGGTGGTACTGATTGCGTAAGGAATGTTGACACCAC |
